# Supplementary material for: Different Effects of RNAi-Mediated Downregulation or Chemical Inhibition of NAMPT in an Isogenic IDH Mutant and Wild-Type Glioma Cell Model
Source: MDPI journal article supplement (doi:10.3390/ijms23105787), 2022-05-21
Supplement: s1 [file s1]

## Supplementary Material

### **Different effects of RNAi-mediated downregulation or chemical inhibition of NAMPT in IDH mutant and wild-type glioma cells**

Maximilian Clausing<sup>1,2</sup>, Doreen William<sup>1,3</sup>, Matthias Preussler<sup>1,2</sup>, Julia Biedermann<sup>1,2</sup>, Konrad Grützmann<sup>3</sup>, Susan Richter<sup>4</sup>, Frank Buchholz<sup>5</sup>, Achim Temme<sup>2,6</sup>, Evelin Schröck<sup>1,3</sup>, Barbara Klink<sup>1,3,7,\*</sup>

<sup>1</sup> Institute for Clinical Genetics, University Hospital Carl Gustav Carus at the Technische Universität Dresden, 01307 Dresden, Germany, ERN-GENTURIS, Hereditary Cancer Syndrome Center Dresden, Germany

<sup>2</sup> National Center for Tumor Diseases partner site Dresden (NCT/UCC), Germany, German Cancer Consortium (DKTK), Dresden, Germany; German Cancer Research Center (DKFZ), Heidelberg, Germany

<sup>3</sup> Core Unit for Molecular Tumor Diagnostics (CMTD), National Center for Tumor Diseases (NCT/UCC), Dresden, Germany, German Cancer Consortium (DKTK), Dresden, Germany; German Cancer Research Center (DKFZ), Heidelberg, Germany

<sup>4</sup> Institute for Clinical Chemistry and Laboratory Medicine, University Hospital Carl Gustav Carus, Technische Universität Dresden, 01307 Dresden, Germany

<sup>5</sup> Medical Systems Biology, Faculty of Medicine and University Hospital Carl Gustav Carus, Technische Universität Dresden, 01307 Dresden, Germany

<sup>6</sup> Department of Neurosurgery, Section Experimental Neurosurgery/Tumor Immunology, University Hospital Carl Gustav Carus, Technische Universität Dresden, 01307 Dresden, Germany

<sup>7</sup> National Center of Genetics (NCG), Laboratoire National de Santé (LNS), 1, Rue Louis Rech, L-3555 Dudelange, Luxembourg

\* Correspondence: barbara.klink@lns.etat.lu

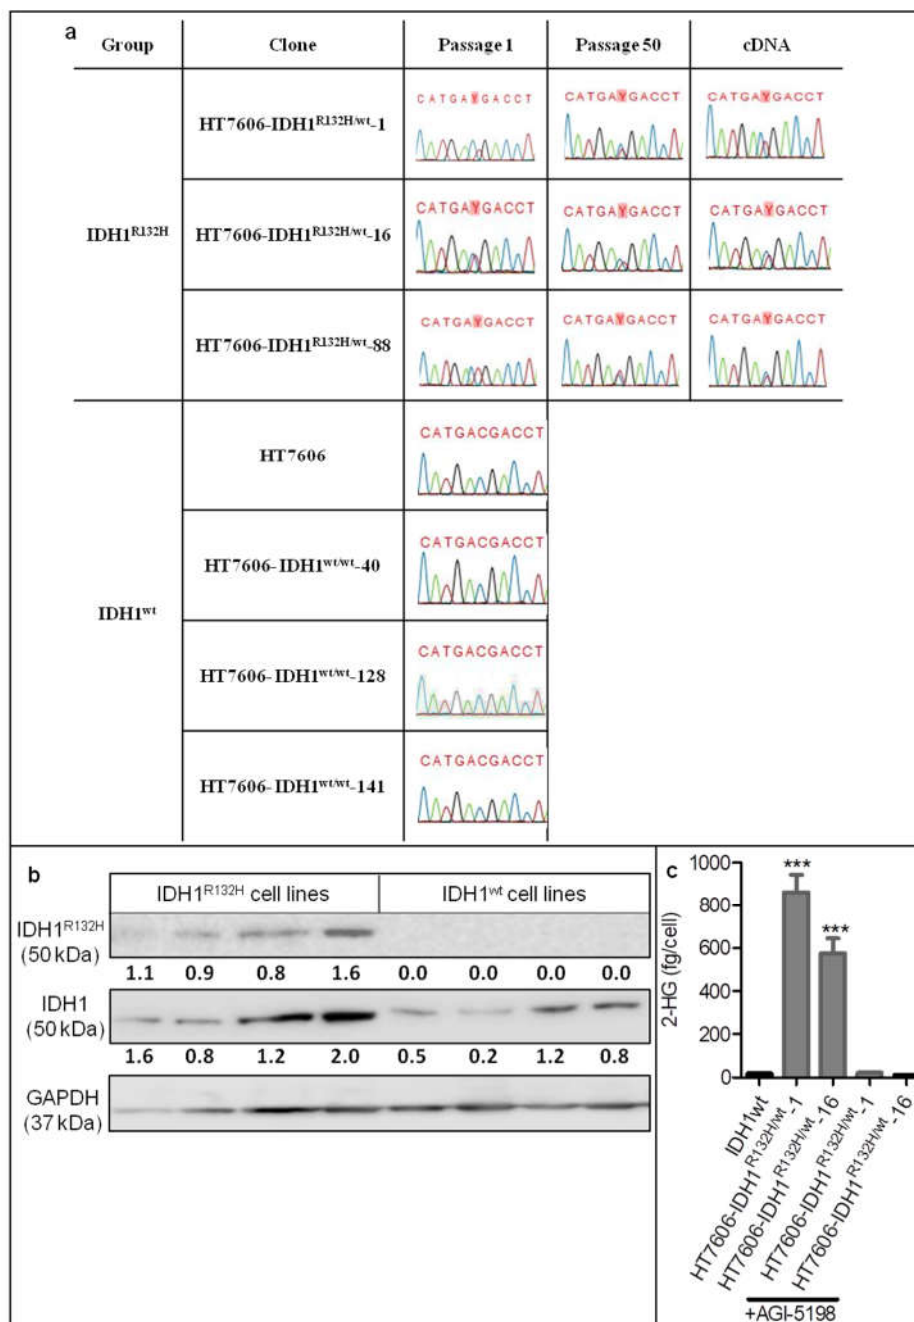

**Supplementary Figure S1.** (a) genomic status of edited IDH1 c.395G>A clones. All edited clones were sequenced for the IDH1 c.395G>A Mutation. The heterozygous mutation remained over a period of 50 passages and was present in a heterozygous state on cDNA level confirming the transcription of the mutated allele. HT7606-IDH1<sup>R132H/wt</sup>-16 was created using the Cas9-NLS-tagRFP. The remaining cell lines were created using the Cas9-plasmid pX458. (b) Western Blot analyses of IDH1 and IDH1<sup>R132H</sup> in IDH1<sup>wt</sup> cell lines (HT7606, HT7606-IDH1<sup>wt</sup>/wt-128) and IDH1<sup>R132H</sup> cell lines (HT7606-IDH1<sup>R132H</sup>/wt-88, HT7606-IDH1<sup>R132H</sup>/wt-1, HT7606-IDH1<sup>R132H</sup>/wt-16). GAPDH was used as protein loading control. Data present the ratio of NAMPT to GAPDH. (c) 2-HG levels were measured using liquid chromatography-tandem mass spectrometry in untreated IDH1<sup>wt</sup> and IDH1<sup>R132H</sup> cells and after treatment with the selective mutant IDH1 inhibitor AGI-5198 for 48 hours ( $n_b$  for IDH1<sup>wt</sup>=3;  $n_c$ =2; \*\*\*  $p \leq 0.001$ ).

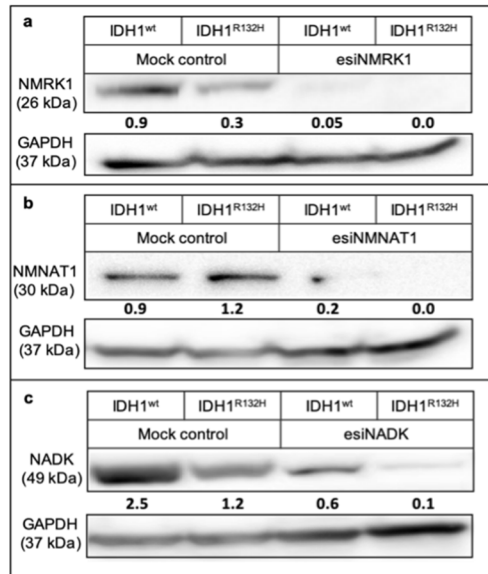

**Supplementary Figure S2.** Western blot analyses of NMRK1 (a), NMNAT1 (b) and NADK (c) in IDH1<sup>wt</sup> (HT7606-IDH1<sup>wt/wt</sup>-40) and IDH1<sup>R132H</sup> cells (HT7606-IDH1<sup>R132H/wt</sup>-1) after treatment with mock control, esiNMRK1 (a), esiNMNAT1 (b) or esiNADK (c) for 72 hours. GAPDH was used as protein loading control. Data present the ratio of NAMPT to GAPDH. (n=3).

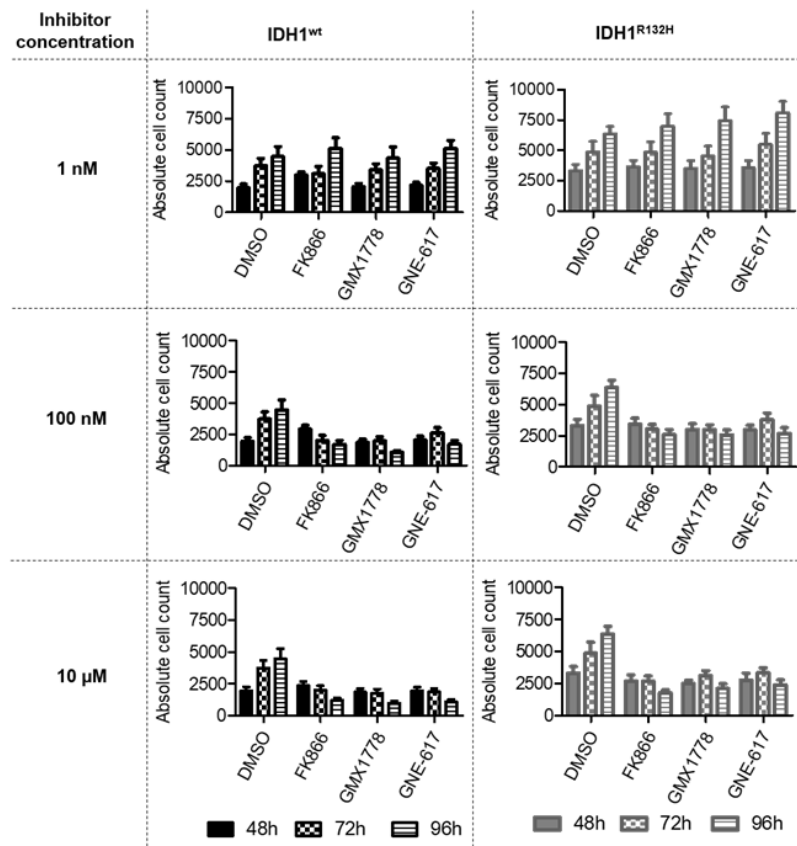

**Supplementary Figure S3.** Low concentrations of NAMPT inhibitors are not sufficient to induce cytotoxicity in IDH1<sup>wt</sup> or IDH1<sup>R132H</sup> cells. Cell count was determined by live and dead staining with Hoechst and Propidium Iodide with the Operetta Imaging system after treatment with 1 nM, 100 nM or 10 μM of FK866, GMX1778 and GNE-617 for 48, 72 or 96 hours. (n=3 per group; n=3).

**Supplementary Table S1.** Overview of oligonucleotides.

| Name                   | Sequence (5' to 3')       | length (nt) | Purpose                                  |
|------------------------|---------------------------|-------------|------------------------------------------|
| IDH1_395A_F            | GGGTAAAACCTATCATCATAGGTAA | 164         | Allele-specific PCR<br>after CRISPR/Cas  |
| IDH1_395G_F            | GGGTAAAACCTATCATCATAGGTAG |             |                                          |
| IDH1_395_R             | TCATACCTTGCTTAATGGGT      |             |                                          |
| IDH1_ex4_2_R           | CCAAGTCACCAAGGATGCTG      | 467         | IDH1 Sanger-<br>Sequencing               |
| IDH1_in4_2_F           | TGTTGAGATGGACGCCTATTTG    |             |                                          |
| cIDH1_ex4_F1           | GGCCAACCCCTTAGACAGAG      | 450         | IDH1 cDNA Sanger-<br>Sequencing          |
| cIDH1_ex6_R            | CACCAAGGATGCTGCAGAAG      |             |                                          |
| ATP1A1_sgRNA5_OT8_F    | ATGCAGGTGAAGAGCCAGAG      | 246         |                                          |
| ATP1A1_sgRNA5_OT8_R    | GGCAAAGGTTTACAAATCACC     |             |                                          |
| C21orf15_sgRNA5_2_F    | GTCCATGGTGTGACTGCTC       |             |                                          |
| C21orf15_sgRNA5_2_R    | TCCCCAGAAACATCCACAGA      | 193         |                                          |
| CHI3L2_sgRNA5_OT5_F    | TGCTTCTTTCCAGGTTCCAC      |             |                                          |
| CHI3L2_sgRNA5_OT5_R    | CTGAGTACACCGTGGCATCT      |             |                                          |
| FAM95C_sgRNA5_OT7_F    | AACCTCTGACTCTGCCTTGG      | 296         |                                          |
| FAM95C_OT7_2_R         | TAAGTGGTTGCCGTTTGTGG      |             |                                          |
| FAT2_sgRNA5_OT4_2_F    | GGCCCCACAGAGAAAACAAG      |             |                                          |
| FAT2_sgRNA5_OT4_R      | TTGGGCACTTCACCATTAC       | 219         |                                          |
| MME_sgRNA5_OT10_F      | TGCTTTAGGTGCTTCTTGGA      |             |                                          |
| MME_sgRNA5_OT10_R      | CCAGGTATTAGGGACAGAGCA     |             |                                          |
| NEB_sgRNA5_OT14_F      | TGCAGGAATGAGGAAGAGCA      | 268         | CRISPR/Cas gRNA<br>off-targets screening |
| NEB_sgRNA5_OT14_R      | AGATGTCAGCTACCACACCT      |             |                                          |
| NFE2L1_sgRNA5_OT11_F   | GACACTCTGACCCAAGACGA      |             |                                          |
| NFE2L1_sgRNA5_2_R      | CTGGCAGAACACAAGGGATG      | 217         |                                          |
| ORC2_sgRNA5_OT3_F      | TCCCAGAGCAGTGAACAAGT      |             |                                          |
| ORC2_sgRNA5_OT3_R      | AGCAGCTCTACAGATCCACT      |             |                                          |
| PGK1_sgRNA5_OT9_2_F    | GCCTTACAGTTTTGGTGCCA      | 241         |                                          |
| PGK1_sgRNA5_OT9_R      | TTCTACCCACCTCTCACTGC      |             |                                          |
| PHGDH_sgRNA5_OT2_F     | AGCTGAGAACTCCAGGTGG       |             |                                          |
| PHGDH_sgRNA5_OT2_R     | TGCTGTGTGTGTTGACCATG      | 253         |                                          |
| PRR14L_sgRNA5_OT1_F    | GCAACAGAGCAGTACCTTGC      |             |                                          |
| PRR14L_sgRNA5_OT1_R    | TGCAGATTGAAGAGGCAGGA      |             |                                          |
| TMEM184A_sgRNA5_OT12_F | CGCAGATTTGAGCAACTTGAC     | 308         |                                          |
| TMEM184A_sgRNA5_OT12_R | TCTTGCTTCCTGGGCTGAG       |             |                                          |
| WIPF2_sgRNA5_OT13_F    | GCTGCTCTCGAACTCCTGA       |             |                                          |
| WIPF2_sgRNA5_OT13_R    | CTCCTTGGAAGAGACCTCCC      | 306         |                                          |
| cNAMPT_ex1_F           | GGCAGAAGCCGAGTTCAA        | 82          |                                          |
| cNAMPT_ex2_R           | GCTTGTGTGGGTGGATATTG      |             |                                          |
| ARF1_qPCR_F            | GACCACGATCCTCTACAAGC      |             |                                          |
| ARF1_qPCR_R            | TCCCACACAGTGAAGCTGATG     | 111         | RT-qPCR measurement                      |
| GAPDH_2_F              | ATGTTTCGTCATGGGTGTGAA     |             |                                          |
| GAPDH_2_R              | GGTGCTAAGCAGTTGGTGGT      |             |                                          |

**Supplementary Table S2.** Possible off-target regions of the specific gRNA used in the CRISPR/Cas experiments that were predicted with [crispr.mit.edu](http://crispr.mit.edu). All off-target sequences located in genes are listed and were negatively screened for in all clones using Sanger Sequencing.

| Gene name | Sequence                | Locus           |
|-----------|-------------------------|-----------------|
| CHI3L2    | ATGAATCAAGTAATTCATGTGAG | chr1:+111777685 |
| ATP1A1    | GGGGATGAAGTAAGTAATGAAGG | chr1:+116943872 |
| PHGDH     | GGTTATGAAGTAAGTCATGGAGG | chr1:+120263934 |
| NEB       | GGGCATCAAGTAACTGATCTGAG | chr2:+152406288 |
| ORC2      | AAGGAACAAGTAAGTCATGAGAG | chr2:+201778278 |
| MME       | GTGAATCATGTAATTCATGTAAG | chr3:+154834756 |
| FAT2      | CGGGAACAGGTGAGTCATGTGGG | chr5:-150907538 |
| TMEM184A  | GGGGATCCAATAAGACAGGTGGG | chr7:+1584857   |
| FAM95C    | AGGCATCAAGTAAGGCCTGTGGG | chr9:-38542926  |
| WIPF2     | GGTGACCAAGTAAATCATGAGGG | chr17:-38418704 |
| NFE2L1    | GTGGAGAAAGTAAGTCACGTGGG | chr17:+46128171 |
| C21orf15  | AGGCATCAAGTAAGTCTTATGGG | chr21:-15220392 |
| PRR14L    | GAGGATCAAATAAGTCCTGTAAG | chr22:-32112066 |
| PGK1      | GAGGATAAAGTCAGCCATGTGAG | chrX:+77380863  |
